# Supplementary material for: Uniform genomic data analysis in the NCI Genomic Data Commons
Source: PubMed Central journal article supplement (PMC7900240; doi:10.1038/s41467-021-21254-9), 2021-02-22
Supplement: 41467_2021_21254_MOESM1_ESM.pdf [file 41467_2021_21254_MOESM1_ESM.pdf]

| Contig_Name | Virus_Name                                                    | GenBank_Accession | PaVE_ID  | Sequence Revised |
|-------------|---------------------------------------------------------------|-------------------|----------|------------------|
| CMV         | Human Cytomegalovirus, Human herpes virus 5                   | AY446894.2        | N/A      |                  |
| EBV         | Epstein-Barr virus, , Human herpes virus 4                    | AJ507799.2        | N/A      |                  |
| HBV         | Hepatitis B                                                   | X04615.1          | N/A      |                  |
| HCV-1       | Hepatitis C                                                   | AF009606.1        | N/A      |                  |
| HCV-2       | Hepatitis C                                                   | AF177036.1        | N/A      |                  |
| HIV-1       | Human immunodeficiency virus 1                                | AF033819.3        | N/A      |                  |
| HIV-2       | Human immunodeficiency virus 2                                | M30502.1          | N/A      |                  |
| KSHV        | Kaposi's sarcoma-associated herpesvirus, Human herpes virus 8 | AF148805.2        | N/A      |                  |
| HTLV-1      | Human T-lymphotropic virus 1                                  | AF033817.1        | N/A      |                  |
| MCV         | Merkel cell polyomavirus                                      | HM011556.1        | N/A      |                  |
| SV40        | Simian vacuolating virus 40                                   | J02400.1          | N/A      |                  |
| HPV16       | Human papillomavirus 16                                       | K02718            | HPV16REF | Yes              |
| HPV18       | Human papillomavirus 18                                       | X05015            | HPV18REF | Yes              |
| HPV26       | Human papillomavirus 26                                       | X74472            | HPV26REF |                  |
| HPV31       | Human papillomavirus 31                                       | J04353            | HPV31REF |                  |
| HPV33       | Human papillomavirus 33                                       | M12732            | HPV33REF |                  |
| HPV35       | Human papillomavirus 35                                       | X74477            | HPV35REF |                  |
| HPV39       | Human papillomavirus 39                                       | M62849            | HPV39REF |                  |
| HPV45       | Human papillomavirus 45                                       | X74479            | HPV45REF |                  |
| HPV51       | Human papillomavirus 51                                       | M62877            | HPV51REF |                  |
| HPV52       | Human papillomavirus 52                                       | X74481            | HPV52REF |                  |
| HPV53       | Human papillomavirus 53                                       | X74482            | HPV53REF | Yes              |
| HPV56       | Human papillomavirus 56                                       | X74483            | HPV56REF | Yes              |
| HPV58       | Human papillomavirus 58                                       | D90400            | HPV58REF |                  |
| HPV59       | Human papillomavirus 59                                       | X77858            | HPV59REF | Yes              |
| HPV66       | Human papillomavirus 66                                       | U31794            | HPV66REF |                  |
| HPV68       | Human papillomavirus 68                                       | DQ080079          | HPV68REF |                  |
| HPV69       | Human papillomavirus 69                                       | AB027020          | HPV69REF |                  |
| HPV73       | Human papillomavirus 73                                       | X94165            | HPV73REF |                  |
| HPV82       | Human papillomavirus 82                                       | AB027021          | HPV82REF | Yes              |
| HPV1        | Human papillomavirus 1                                        | V01116            | HPV1REF  | Yes              |
| HPV2        | Human papillomavirus 2                                        | X55964            | HPV2REF  |                  |
| HPV3        | Human papillomavirus 3                                        | X74462            | HPV3REF  |                  |
| HPV4        | Human papillomavirus 4                                        | X70827            | HPV4REF  |                  |
| HPV5        | Human papillomavirus 5                                        | M17463            | HPV5REF  | Yes              |
| HPV6        | Human papillomavirus 6                                        | X00203            | HPV6REF  | Yes              |
| HPV7        | Human papillomavirus 7                                        | X74463            | HPV7REF  |                  |
| HPV8        | Human papillomavirus 8                                        | M12737            | HPV8REF  |                  |
| HPV9        | Human papillomavirus 9                                        | X74464            | HPV9REF  |                  |
| HPV10       | Human papillomavirus 10                                       | X74465            | HPV10REF |                  |
| HPV11       | Human papillomavirus 11                                       | M14119            | HPV11REF |                  |
| HPV12       | Human papillomavirus 12                                       | X74466            | HPV12REF |                  |
| HPV13       | Human papillomavirus 13                                       | X62843            | HPV13REF |                  |
| HPV14       | Human papillomavirus 14                                       | X74467            | HPV14REF | Yes              |
| HPV15       | Human papillomavirus 15                                       | X74468            | HPV15REF | Yes              |
| HPV17       | Human papillomavirus 17                                       | X74469            | HPV17REF | Yes              |

|       |                         |          |          |     |
|-------|-------------------------|----------|----------|-----|
| HPV19 | Human papillomavirus 19 | X74470   | HPV19REF |     |
| HPV20 | Human papillomavirus 20 | U31778   | HPV20REF |     |
| HPV21 | Human papillomavirus 21 | U31779   | HPV21REF |     |
| HPV22 | Human papillomavirus 22 | U31780   | HPV22REF |     |
| HPV23 | Human papillomavirus 23 | U31781   | HPV23REF |     |
| HPV24 | Human papillomavirus 24 | U31782   | HPV24REF |     |
| HPV25 | Human papillomavirus 25 | X74471   | HPV25REF |     |
| HPV27 | Human papillomavirus 27 | X74473   | HPV27REF |     |
| HPV28 | Human papillomavirus 28 | U31783   | HPV28REF |     |
| HPV29 | Human papillomavirus 29 | U31784   | HPV29REF |     |
| HPV30 | Human papillomavirus 30 | X74474   | HPV30REF |     |
| HPV32 | Human papillomavirus 32 | X74475   | HPV32REF |     |
| HPV34 | Human papillomavirus 34 | X74476   | HPV34REF |     |
| HPV36 | Human papillomavirus 36 | U31785   | HPV36REF |     |
| HPV37 | Human papillomavirus 37 | U31786   | HPV37REF |     |
| HPV38 | Human papillomavirus 38 | U31787   | HPV38REF |     |
| HPV40 | Human papillomavirus 40 | X74478   | HPV40REF |     |
| HPV41 | Human papillomavirus 41 | X56147   | HPV41REF |     |
| HPV42 | Human papillomavirus 42 | M73236   | HPV42REF |     |
| HPV43 | Human papillomavirus 43 | AJ620205 | HPV43REF |     |
| HPV44 | Human papillomavirus 44 | U31788   | HPV44REF |     |
| HPV47 | Human papillomavirus 47 | M32305   | HPV47REF |     |
| HPV48 | Human papillomavirus 48 | U31789   | HPV48REF |     |
| HPV49 | Human papillomavirus 49 | X74480   | HPV49REF |     |
| HPV50 | Human papillomavirus 50 | U31790   | HPV50REF |     |
| HPV54 | Human papillomavirus 54 | AF436129 | HPV54REF |     |
| HPV57 | Human papillomavirus 57 | X55965   | HPV57REF |     |
| HPV60 | Human papillomavirus 60 | U31792   | HPV60REF |     |
| HPV61 | Human papillomavirus 61 | U31793   | HPV61REF |     |
| HPV62 | Human papillomavirus 62 | AY395706 | HPV62REF |     |
| HPV63 | Human papillomavirus 63 | X70828   | HPV63REF |     |
| HPV65 | Human papillomavirus 65 | X70829   | HPV65REF |     |
| HPV67 | Human papillomavirus 67 | D21208   | HPV67REF |     |
| HPV70 | Human papillomavirus 70 | U21941   | HPV70REF |     |
| HPV71 | Human papillomavirus 71 | AB040456 | HPV71REF | Yes |
| HPV72 | Human papillomavirus 72 | X94164   | HPV72REF | Yes |
| HPV74 | Human papillomavirus 74 | AF436130 | HPV74REF |     |
| HPV75 | Human papillomavirus 75 | Y15173   | HPV75REF |     |
| HPV76 | Human papillomavirus 76 | Y15174   | HPV76REF |     |
| HPV77 | Human papillomavirus 77 | Y15175   | HPV77REF |     |
| HPV78 | Human papillomavirus 78 | KC138720 | HPV78REF |     |
| HPV80 | Human papillomavirus 80 | Y15176   | HPV80REF |     |
| HPV81 | Human papillomavirus 81 | AJ620209 | HPV81REF |     |
| HPV83 | Human papillomavirus 83 | AF151983 | HPV83REF |     |
| HPV84 | Human papillomavirus 84 | AF293960 | HPV84REF |     |
| HPV85 | Human papillomavirus 85 | AF131950 | HPV85REF |     |
| HPV86 | Human papillomavirus 86 | AF349909 | HPV86REF |     |
| HPV87 | Human papillomavirus 87 | AJ400628 | HPV87REF | Yes |
| HPV88 | Human papillomavirus 88 | EF467176 | HPV88REF |     |

|        |                          |          |           |     |
|--------|--------------------------|----------|-----------|-----|
| HPV89  | Human papillomavirus 89  | AF436128 | HPV89REF  |     |
| HPV90  | Human papillomavirus 90  | AY057438 | HPV90REF  |     |
| HPV91  | Human papillomavirus 91  | AF419318 | HPV91REF  |     |
| HPV92  | Human papillomavirus 92  | AF531420 | HPV92REF  |     |
| HPV93  | Human papillomavirus 93  | AY382778 | HPV93REF  |     |
| HPV94  | Human papillomavirus 94  | AJ620211 | HPV94REF  |     |
| HPV95  | Human papillomavirus 95  | AJ620210 | HPV95REF  |     |
| HPV96  | Human papillomavirus 96  | AY382779 | HPV96REF  |     |
| HPV97  | Human papillomavirus 97  | DQ080080 | HPV97REF  |     |
| HPV98  | Human papillomavirus 98  | FM955837 | HPV98REF  |     |
| HPV99  | Human papillomavirus 99  | FM955838 | HPV99REF  |     |
| HPV100 | Human papillomavirus 100 | FM955839 | HPV100REF |     |
| HPV101 | Human papillomavirus 101 | DQ080081 | HPV101REF |     |
| HPV102 | Human papillomavirus 102 | DQ080083 | HPV102REF |     |
| HPV103 | Human papillomavirus 103 | DQ080078 | HPV103REF |     |
| HPV104 | Human papillomavirus 104 | FM955840 | HPV104REF |     |
| HPV105 | Human papillomavirus 105 | FM955841 | HPV105REF |     |
| HPV106 | Human papillomavirus 106 | DQ080082 | HPV106REF |     |
| HPV107 | Human papillomavirus 107 | EF422221 | HPV107REF |     |
| HPV108 | Human papillomavirus 108 | FM212639 | HPV108REF | Yes |
| HPV109 | Human papillomavirus 109 | EU541441 | HPV109REF |     |
| HPV110 | Human papillomavirus 110 | EU410348 | HPV110REF |     |
| HPV111 | Human papillomavirus 111 | EU410349 | HPV111REF | Yes |
| HPV112 | Human papillomavirus 112 | EU541442 | HPV112REF |     |
| HPV113 | Human papillomavirus 113 | FM955842 | HPV113REF |     |
| HPV114 | Human papillomavirus 114 | GQ244463 | HPV114REF | Yes |
| HPV115 | Human papillomavirus 115 | FJ947080 | HPV115REF |     |
| HPV116 | Human papillomavirus 116 | FJ804072 | HPV116REF |     |
| HPV117 | Human papillomavirus 117 | GQ246950 | HPV117REF |     |
| HPV118 | Human papillomavirus 118 | GQ246951 | HPV118REF |     |
| HPV119 | Human papillomavirus 119 | GQ845441 | HPV119REF |     |
| HPV120 | Human papillomavirus 120 | GQ845442 | HPV120REF |     |
| HPV121 | Human papillomavirus 121 | GQ845443 | HPV121REF |     |
| HPV122 | Human papillomavirus 122 | GQ845444 | HPV122REF |     |
| HPV123 | Human papillomavirus 123 | GQ845445 | HPV123REF |     |
| HPV124 | Human papillomavirus 124 | GQ845446 | HPV124REF |     |
| HPV125 | Human papillomavirus 125 | FN547152 | HPV125REF |     |
| HPV126 | Human papillomavirus 126 | AB646346 | HPV126REF |     |
| HPV127 | Human papillomavirus 127 | HM011570 | HPV127REF |     |
| HPV128 | Human papillomavirus 128 | GU225708 | HPV128REF |     |
| HPV129 | Human papillomavirus 129 | GU233853 | HPV129REF |     |
| HPV130 | Human papillomavirus 130 | GU117630 | HPV130REF |     |
| HPV131 | Human papillomavirus 131 | GU117631 | HPV131REF |     |
| HPV132 | Human papillomavirus 132 | GU117632 | HPV132REF |     |
| HPV133 | Human papillomavirus 133 | GU117633 | HPV133REF |     |
| HPV134 | Human papillomavirus 134 | GU117634 | HPV134REF |     |
| HPV135 | Human papillomavirus 135 | HM999987 | HPV135REF |     |
| HPV136 | Human papillomavirus 136 | HM999988 | HPV136REF |     |
| HPV137 | Human papillomavirus 137 | HM999989 | HPV137REF |     |

|            |                              |          |              |  |
|------------|------------------------------|----------|--------------|--|
| HPV138     | Human papillomavirus 138     | HM999990 | HPV138REF    |  |
| HPV139     | Human papillomavirus 139     | HM999991 | HPV139REF    |  |
| HPV140     | Human papillomavirus 140     | HM999992 | HPV140REF    |  |
| HPV141     | Human papillomavirus 141     | HM999993 | HPV141REF    |  |
| HPV142     | Human papillomavirus 142     | HM999994 | HPV142REF    |  |
| HPV143     | Human papillomavirus 143     | HM999995 | HPV143REF    |  |
| HPV144     | Human papillomavirus 144     | HM999996 | HPV144REF    |  |
| HPV145     | Human papillomavirus 145     | HM999997 | HPV145REF    |  |
| HPV146     | Human papillomavirus 146     | HM999998 | HPV146REF    |  |
| HPV147     | Human papillomavirus 147     | HM999999 | HPV147REF    |  |
| HPV148     | Human papillomavirus 148     | GU129016 | HPV148REF    |  |
| HPV149     | Human papillomavirus 149     | GU117629 | HPV149REF    |  |
| HPV150     | Human papillomavirus 150     | FN677755 | HPV150REF    |  |
| HPV151     | Human papillomavirus 151     | FN677756 | HPV151REF    |  |
| HPV152     | Human papillomavirus 152     | JF304768 | HPV152REF    |  |
| HPV153     | Human papillomavirus 153     | JN171845 | HPV153REF    |  |
| HPV154     | Human papillomavirus 154     | JN211193 | HPV154REF    |  |
| HPV155     | Human papillomavirus 155     | JF906559 | HPV155REF    |  |
| HPV156     | Human papillomavirus 156     | JX429973 | HPV156REF    |  |
| HPV159     | Human papillomavirus 159     | HE963025 | HPV159REF    |  |
| HPV160     | Human papillomavirus 160     | AB745694 | HPV160REF    |  |
| HPV161     | Human papillomavirus 161     | JX413109 | HPV161REF    |  |
| HPV162     | Human papillomavirus 162     | JX413108 | HPV162REF    |  |
| HPV163     | Human papillomavirus 163     | JX413107 | HPV163REF    |  |
| HPV164     | Human papillomavirus 164     | JX413106 | HPV164REF    |  |
| HPV165     | Human papillomavirus 165     | JX444072 | HPV165REF    |  |
| HPV166     | Human papillomavirus 166     | JX413104 | HPV166REF    |  |
| HPV167     | Human papillomavirus 167     | KC862318 | HPV167REF    |  |
| HPV168     | Human papillomavirus 168     | KC862317 | HPV168REF    |  |
| HPV169     | Human papillomavirus 169     | JX413105 | HPV169REF    |  |
| HPV170     | Human papillomavirus 170     | JX413110 | HPV170REF    |  |
| HPV171     | Human papillomavirus 171     | KF006398 | HPV171REF    |  |
| HPV172     | Human papillomavirus 172     | KF006399 | HPV172REF    |  |
| HPV173     | Human papillomavirus 173     | KF006400 | HPV173REF    |  |
| HPV174     | Human papillomavirus 174     | HF930491 | HPV174REF    |  |
| HPV175     | Human papillomavirus 175     | KC108721 | HPV175REF    |  |
| HPV178     | Human papillomavirus 178     | KJ130020 | HPV178REF    |  |
| HPV179     | Human papillomavirus 179     | HG421739 | HPV179REF    |  |
| HPV180     | Human papillomavirus 180     | KC108722 | HPV180REF    |  |
| HPV184     | Human papillomavirus 184     | HG530535 | HPV184REF    |  |
| HPV197     | Human papillomavirus 197     | KM085343 | HPV197REF    |  |
| HPV199     | Human papillomavirus 199     | KJ913662 | HPV199REF    |  |
| HPV-mCG2   | Human papillomavirus -mCG2   | JF966378 | HPV-mCG2nr   |  |
| HPV-mCG3   | Human papillomavirus -mCG3   | JF966379 | HPV-mCG3nr   |  |
| HPV-mCH2   | Human papillomavirus -mCH2   | KF791917 | HPV-mCH2nr   |  |
| HPV-mFD1   | Human papillomavirus -mFD1   | JF966375 | HPV-mFD1nr   |  |
| HPV-mFD2   | Human papillomavirus -mFD2   | JF966376 | HPV-mFD2nr   |  |
| HPV-mFS1   | Human papillomavirus -mFS1   | JF966373 | HPV-mFS1nr   |  |
| HPV-mFi864 | Human papillomavirus -mFi864 | KC311731 | HPV-mFi864nr |  |

|            |                              |          |              |  |
|------------|------------------------------|----------|--------------|--|
| HPV-mKC5   | Human papillomavirus -mKC5   | JX444073 | HPV-mKC5nr   |  |
| HPV-mKN1   | Human papillomavirus -mKN1   | JF966371 | HPV-mKN1nr   |  |
| HPV-mKN2   | Human papillomavirus -mKN2   | JF966372 | HPV-mKN2nr   |  |
| HPV-mKN3   | Human papillomavirus -mKN3   | JF966374 | HPV-mKN3nr   |  |
| HPV-mL55   | Human papillomavirus -mL55   | KF482069 | HPV-mL55nr   |  |
| HPV-mRTRX7 | Human papillomavirus -mRTRX7 | U85660   | HPV-mRTRX7nr |  |
| HPV-mSD2   | Human papillomavirus -mSD2   | KC113191 | HPV-mSD2nr   |  |

Supplementary Information Table 1. Virus Sequences included in the GDC Reference Genome.
